# Supplementary material for: Combating Drug Resistance by Exploiting miRNA-200c-Controlled Phase II Detoxification
Source: MDPI journal article supplement (doi:10.3390/cancers14225554), 2022-11-11
Supplement: s1 [file s1]

Figure S1

A

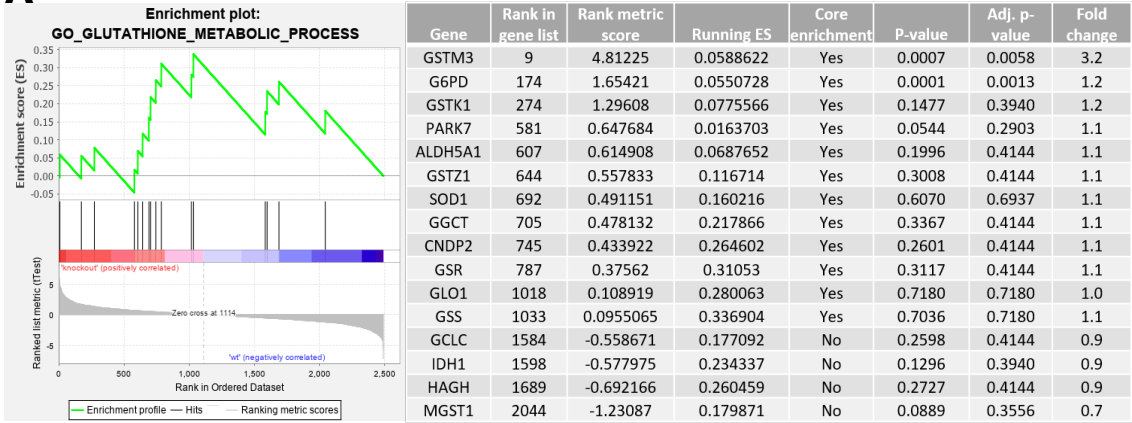

B

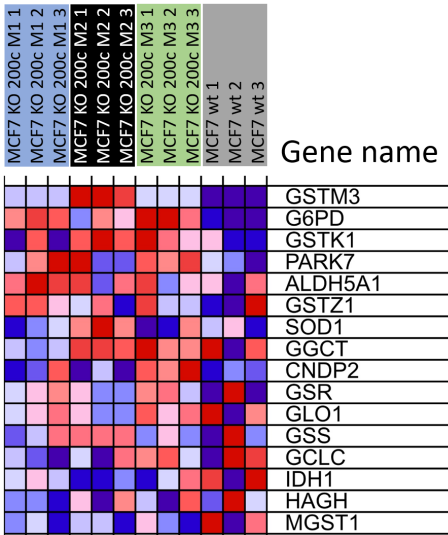

C

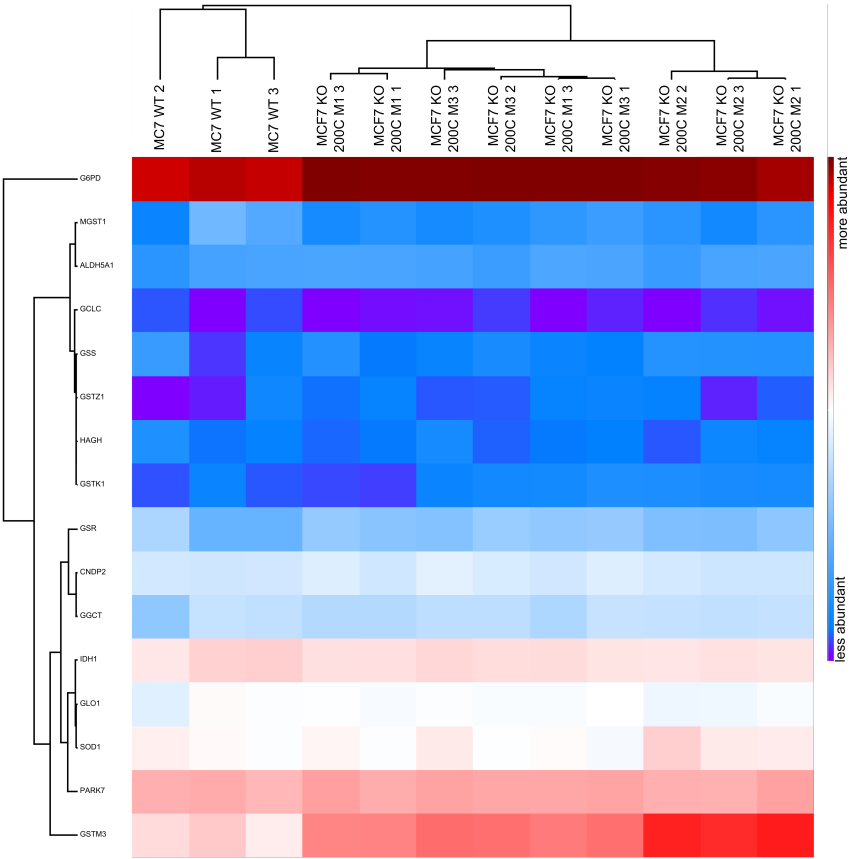

**Figure S1. Proteomic analysis of MCF7 KO 200c (M1, M2, M3) vs. MCF7 wt upon doxorubicin (DXR) treatment. Differential protein expression depending on the hsa-miR-200c expression. (a)** Gene set enrichment plot of the glutathione metabolic process pathway (left) and table of altered protein expression ranked upon metric score (right). **(b)** Corresponding heatmap of the glutathione metabolic process pathway (n=3). **(c)** An unsupervised hierarchical clustering of the proteins of the GO term "Glutathione Metabolic Process".

Figure S2

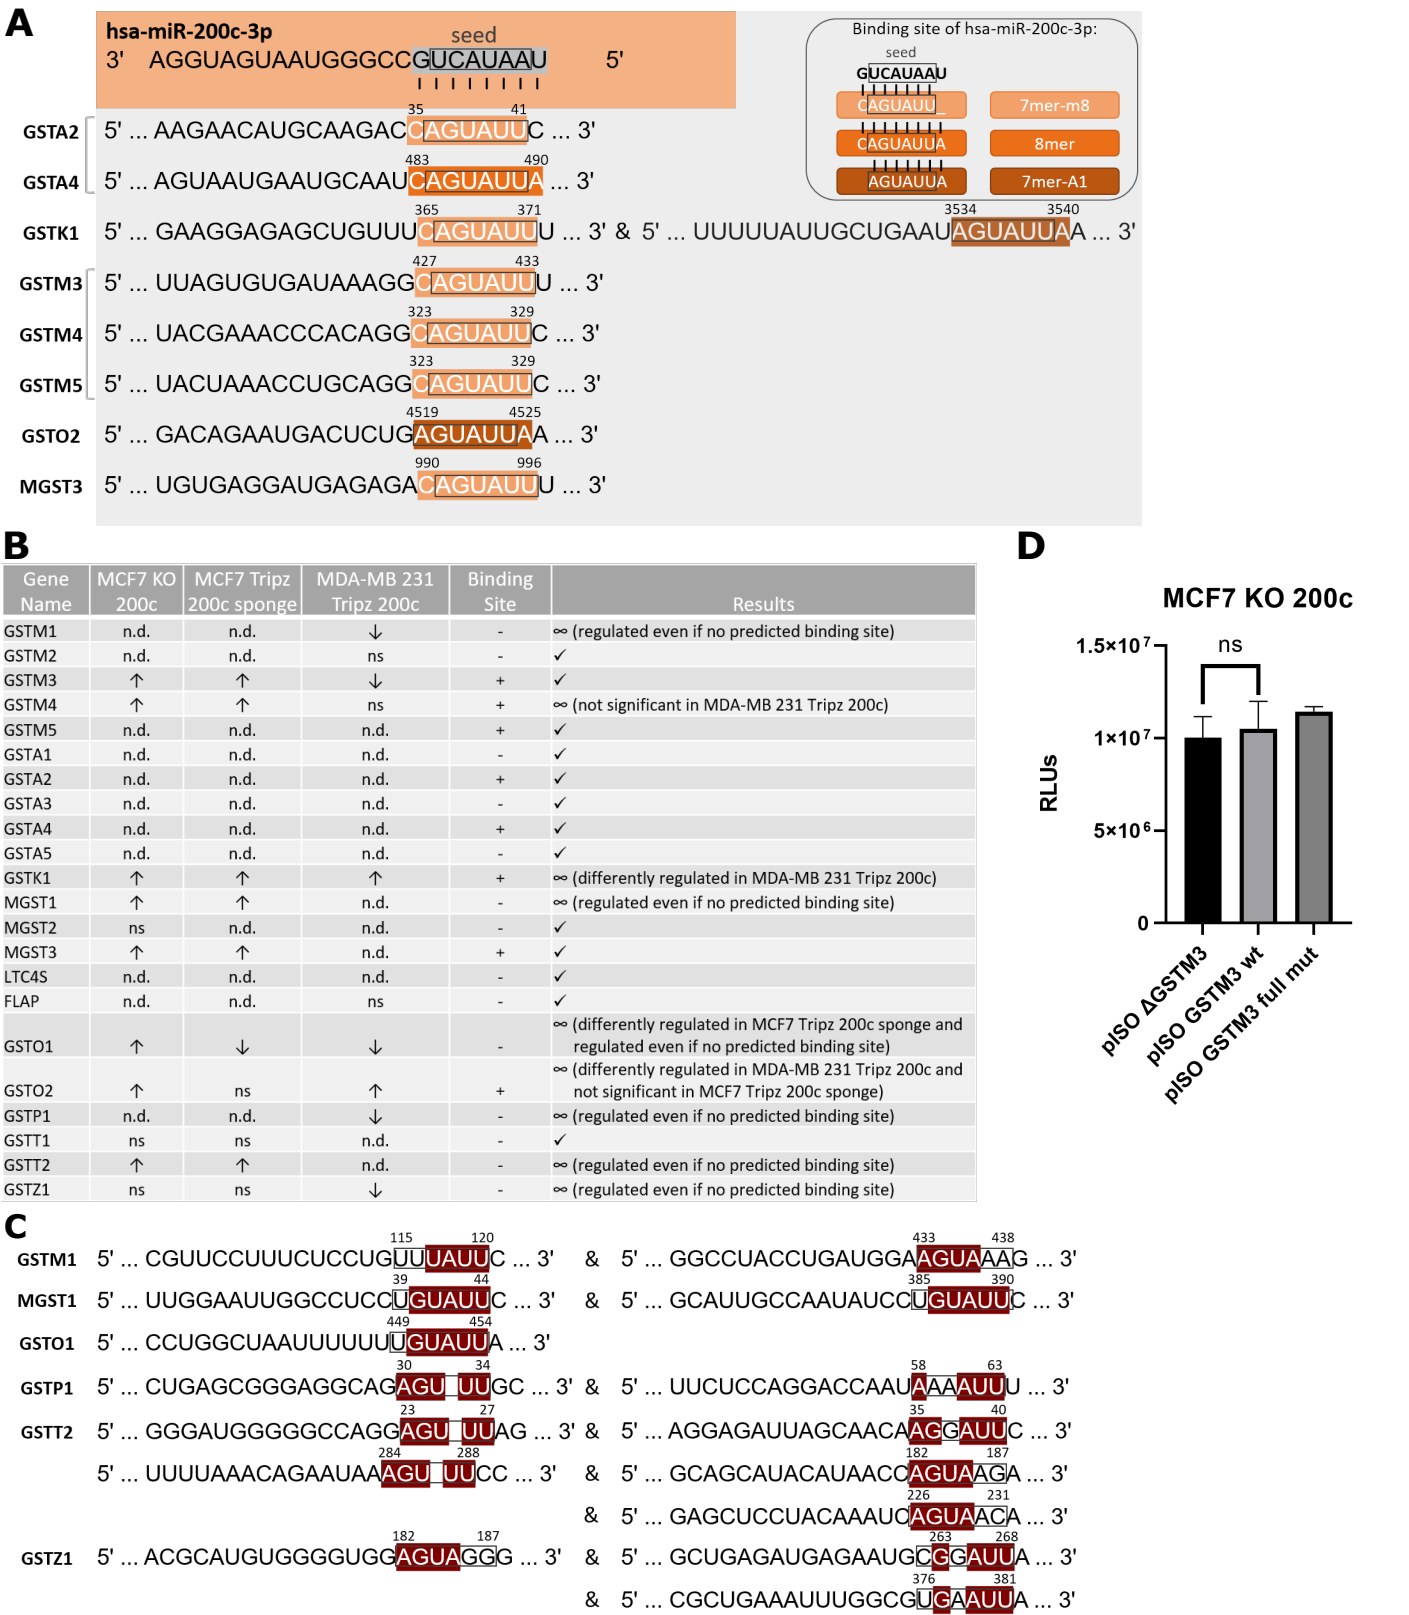

**Figure S2: *In silico* miRNA-mRNA seed-site interaction.** (a) 3'UTR sequences of GSTs with a predicted target site for hsa-miR-200c-3p. The seed region and complementary region are framed. Numbers indicate position within the 3'UTR sequence. Illustration of the 7mer-m8, 8mer and 7mer-A1 is shown on the right. Adapted from TargetScan. (b) Comparison of the regulation of all GSTs in the three hsa-miR-200c expression systems. Results, indicated with a check mark, verify the predicted miRNA-mRNA seed-site interaction. Further evaluation of the interaction is needed if the infinity symbol is displayed. n.d. = not detected, ns = not significant (c) Possible target sites for hsa-miR-200c-3p seed region. Framed sequences display possible complementary regions. Dark red highlighted nucleotides show a complementary match with the hsa-miR-200c-3p seed region. Sequences are adapted from TargetScan. (d) Luciferase assay of different GSTM3 3'UTR reporter plasmids co-transfected with a scrambled siRNA in MCF7 KO 200c cells. One representative diagram is shown. A two-tailed Student's t-test for pISO ΔGSTM3 and pISO GSTM3 wt was performed. Values are displayed as mean with SD.

# Figure S3

A

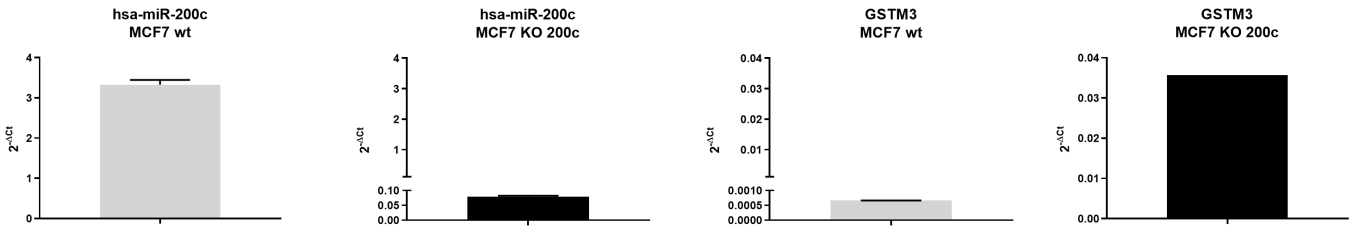

B

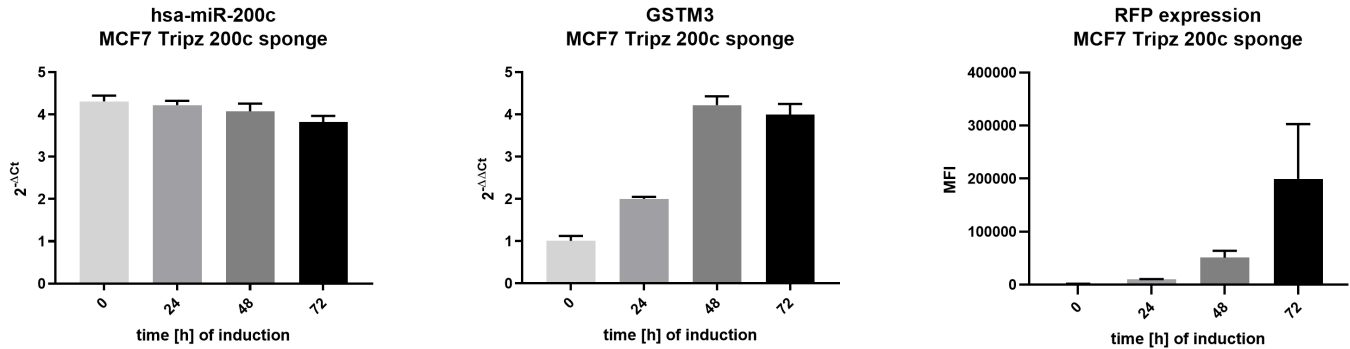

C

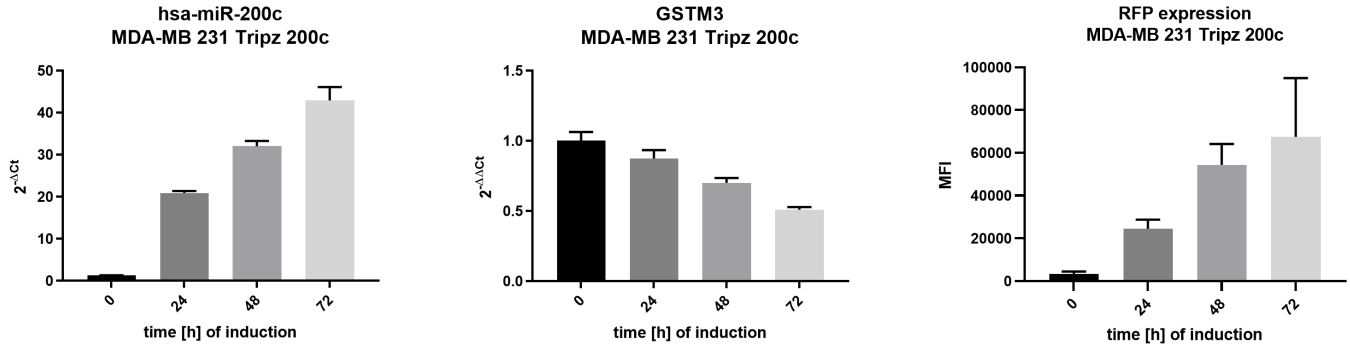

**Figure S3. Characterization of hsa-miR-200c expression systems.** (a) qRT-PCR analysis of hsa-miR-200c and GSTM3 expression in MCF7 wt and KO 200c cells. Quantitative RT-PCR analysis of hsa-miR-200c and GSTM3 expression in (b) MCF7 Tripz 200c sponge cells and (c) in MDA-MB 231 Tripz 200c cells, each induced with 5  $\mu$ g/ml doxycycline and FACS analysis of RFP expression of the same cells displayed as MFI. One representative replicate out of three is displayed. Values are displayed as mean with SD.

Figure S4

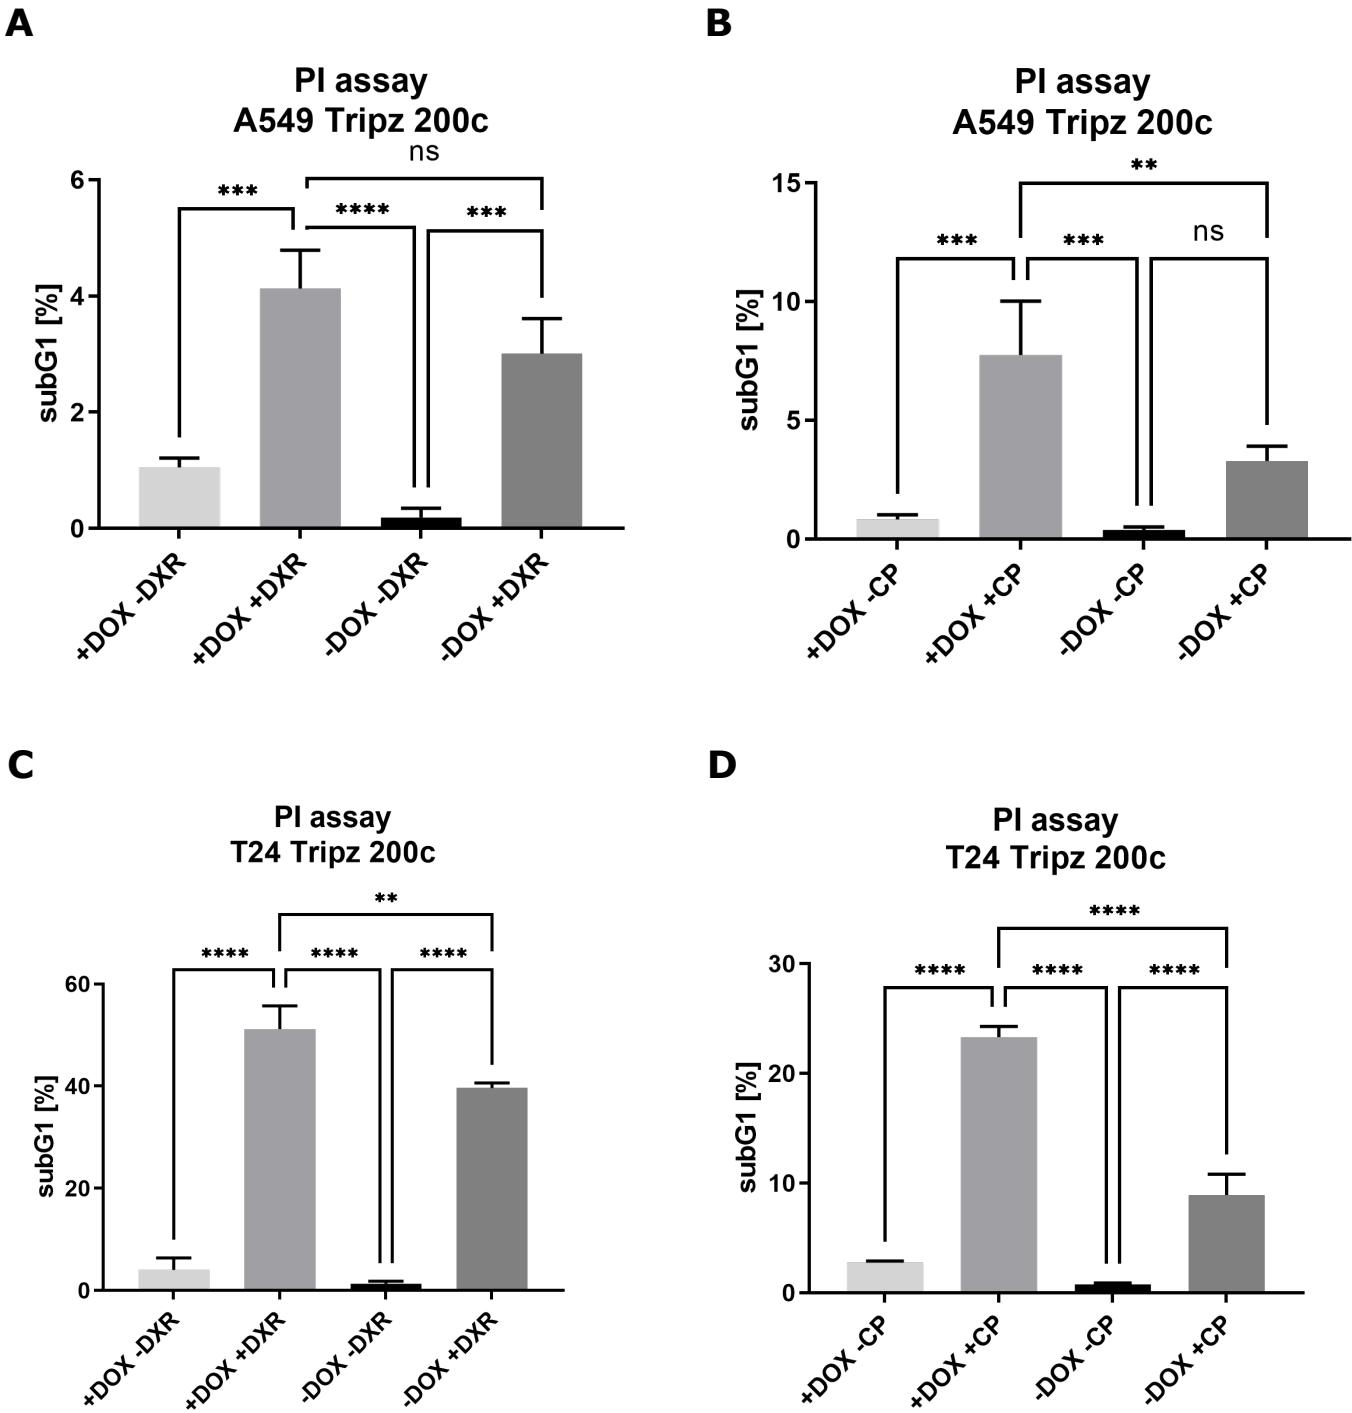

**Figure S4. Effect of hsa-miR-200c on cell death in two additional cancer types in combination with chemotherapeutic treatment.** Analysis of subG1 population in (a, b) A549 lung cancer cells in combination with doxorubicin (DXR) or cisplatin (CP) treatment and (c, d) T24 bladder cancer cells in combination with DXR or CP treatment using propidium iodide assay. Both cell lines were 72 hours pre-induced with DOX or not (-DOX). An ordinary one-way ANOVA with Tukey's multiple comparison test was performed for statistics. \*\*  $p < 0.01$ , \*\*\*  $p < 0.001$ , \*\*\*\*  $p < 0.0001$ . One representative diagram out of three is displayed. Values are displayed as mean with SD.

# Figure S5

## A

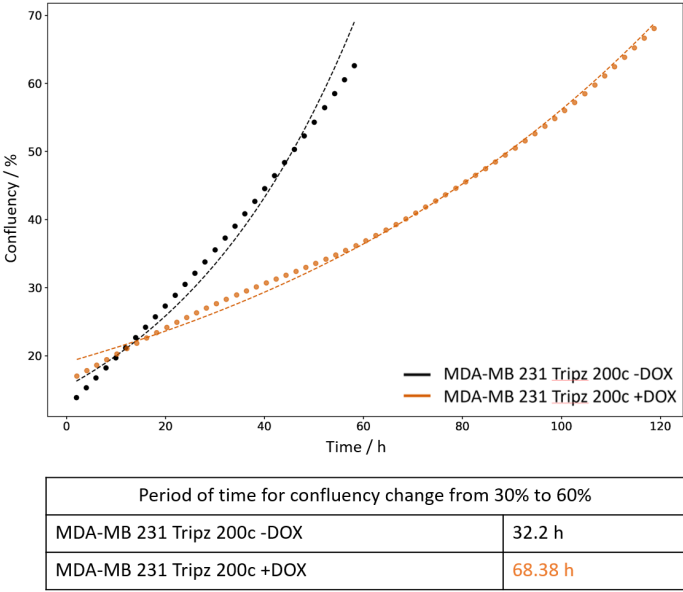

**Figure S5. Proliferation curves of hsa-miR-200c positive or negative MDA-MB 231 cells.** Proliferation of (a) MDA-MB 231 Tripz 200c with doxycycline induction every 48 to 72 hours. Comparison of proliferation slopes and doubling times in hsa-miR-200c expressing (+DOX, orange curve) and hsa-miR-200c depleted (-DOX, black curve) cells. One representative diagram out of three is presented.

# Figure S6

A

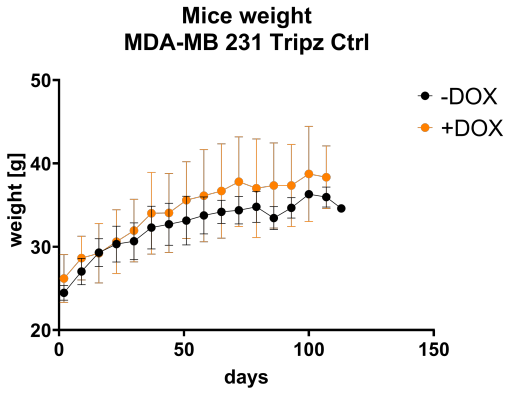

B

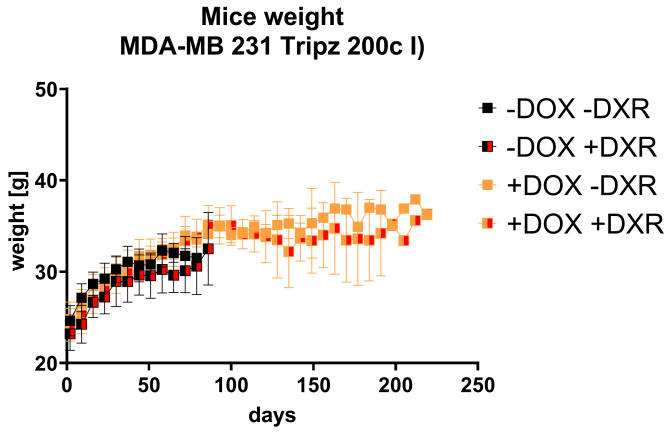

C

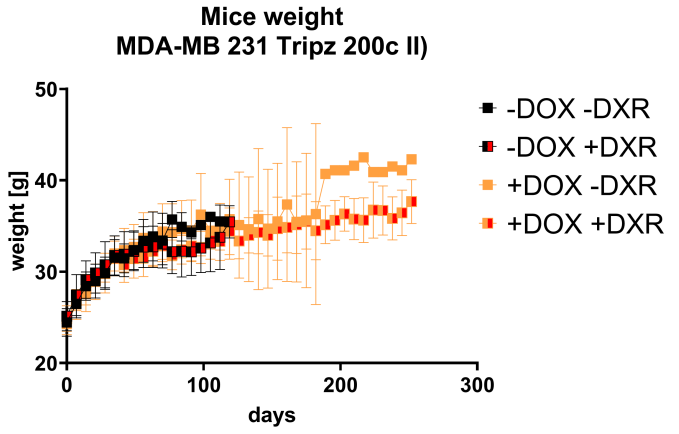

D

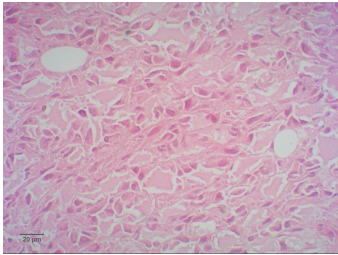

-DOX -DXR

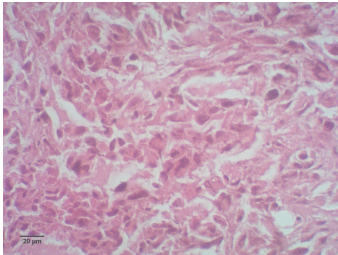

+DOX -DXR

**Figure S6. Animal welfare monitoring of the different xenograft mouse models and histological analysis of hsa-miR-200c positive and negative tumors.** (a) Weekly body weight mean of mice bearing control tumors (MDA-MB 231 Tripz Ctrl) and fed with regular (black curves) or doxycycline (DOX, orange curves) diet (n=5). (b) Body weight mean displayed once a week of mice with hsa-miR-200c positive (MDA-MB 231 Tripz 200 +DOX, orange curves) or negative (-DOX, black curves) tumors and additional chemotherapeutic treatment (n=5, red filled squares) related to animal experiment I) Treatment of hsa-miR-200c positive and negative tumors. (c) Mean body weight (displayed once a week) of mice with initial hsa-miR-200c negative tumors and their subsequent treatment with either doxorubicin (DXR, black curve and red filled squares) or miRNA-200c (orange curve) or their combination (orange curve and red filled squares) related to animal experiment II) Single or double treatment of hsa-miR-200c negative tumors, (n=10 per group). Body weight graphs do not terminate when mice were euthanized. (d) H&E staining of hsa-miR-200c negative (-DOX) or positive (+DOX) tumors without DXR treatment. Values are displayed as mean with SD.

# Figure S7

A

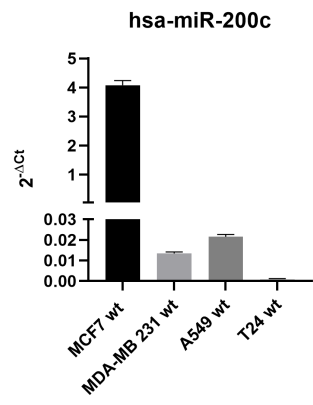

B

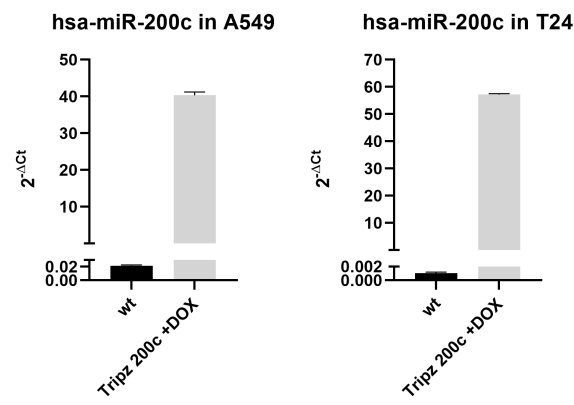

**Figure S7. hsa-miR-200c expression profile.** (a) qRT-PCR analysis of hsa-miR-200c expression in the wt cell lines. (b) Induction of hsa-miR-200c in A549 Tripz 200c (left) and T24 Tripz 200c (right) upon doxycycline application (5 μg/ml) compared to the corresponding wt cell line. Values are displayed as mean with SD.

# Figure S8

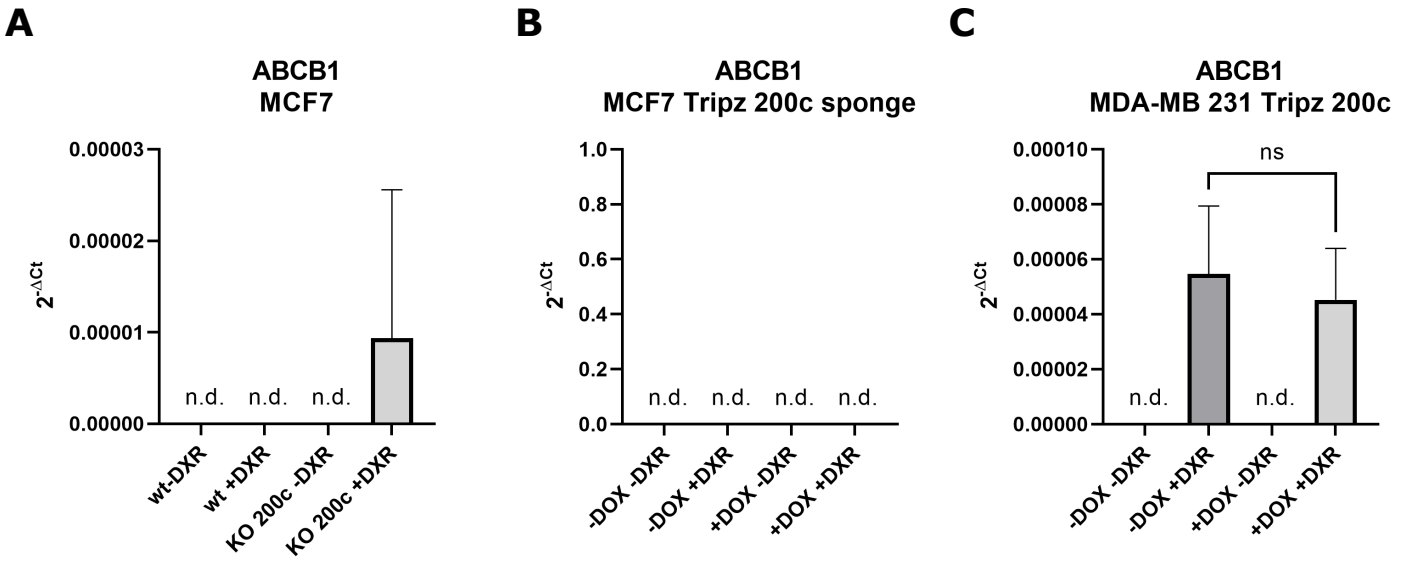

**Figure S8. hsa-miR-200c expression and the abundance of ABCB1.** Expression of ABCB1 analyzed with qRT-PCR in the **(a)** MCF7 wt and KO 200c (treatment with 5  $\mu$ M of DXR for 6 hours), **(b)** the MCF7 Tripz 200c sponge (72 hours DOX pre-induced and treated with 0.1  $\mu$ M DXR for 24 hours) and **(c)** the MDA-MB 231 Tripz 200c cell system (72 hours DOX pre-induced and subsequently treated with 0.6  $\mu$ M DXR for 24 hours). Ct values of 35 and more are uncertain values and therefore were excluded from the analysis and termed as not detected (n.d.). ns = not significant. Values are displayed as mean with SD.



Figure S9

|                                                   |                                            |
|---------------------------------------------------|--------------------------------------------|
| Kaplan-Meier plot for hsa-miR-200c                |                                            |
| miRNA: miRpower for breast cancer                 |                                            |
|                                                   |                                            |
| miRNA ID                                          | hsa-miR-200c                               |
| Survival                                          | Overall survival                           |
| Split patients by                                 | auto select best cutoff                    |
| Follow up threshold                               | 60 months, censor at threshold             |
| Dataset                                           | TCGA                                       |
| ER status                                         | IHC and gene chip: all                     |
| PGR status                                        | IHC: all                                   |
| HER2 status                                       | IHC and gene chip: all                     |
| Molecular subtype                                 | TNBC                                       |
| Grade                                             | all                                        |
| Lymph node status                                 | all                                        |
| Restrict analysis to selected cohorts             | do not use cohorts                         |
|                                                   |                                            |
| Kaplan-Meier plot for GSTM3                       |                                            |
| mRNA gene chip for breast cancer                  |                                            |
|                                                   |                                            |
| Affy ID                                           | 202554_s_at                                |
| Survival                                          | Relapse free survival (RFS)                |
| Split patients by                                 | median                                     |
| Follow up threshold                               | 60 months, censor at threshold             |
| Probe set option                                  | only JetSet best probe set                 |
| ER status                                         | IHC and array: all                         |
| PR status                                         | IHC: all                                   |
| HER2 status                                       | array: all                                 |
| Subtype - StGallen                                | basal                                      |
| Subtype - PAM50                                   | all                                        |
| Lymph node status                                 | all                                        |
| Grade                                             | all                                        |
| TPS3 status                                       | all                                        |
| Pietenpol subtype                                 | all                                        |
| Use earlier release of the database               | all                                        |
| Use following dataset for the analysis            | all                                        |
| Quality control - remove redundant samples        | checked                                    |
| Quality control - array quality control           | exclude biased arrays                      |
| Quality control - proportional hazards assumption | checked                                    |
| Cohorts                                           | patients with following systemic treatment |
| Endocrine therapy                                 | any                                        |
| Chemotherapy                                      | neoadjuvant only                           |

Figure S9: Overview on the parameters entered into the Kaplan-Meier Plotter for the analysis of hsa-miR-200c and GSTM3 in breast cancer patients.

# Figure S10

For Figure 4B:

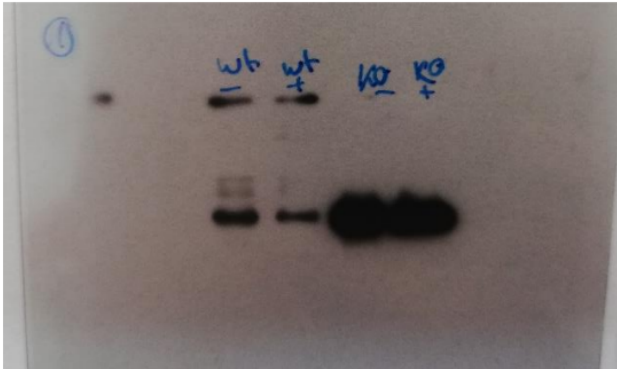

GSTM3

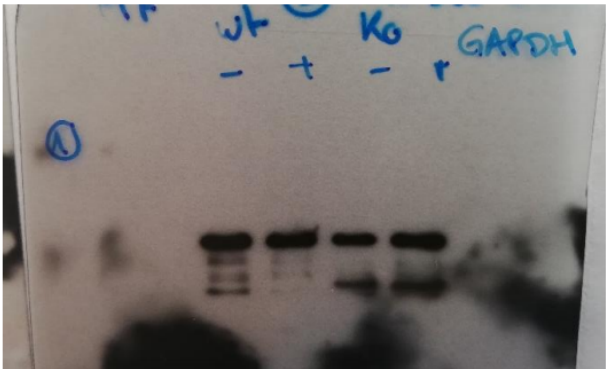

GAPDH

For Figure 4D:

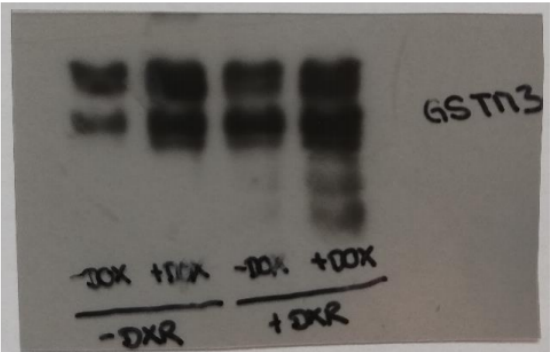

GSTM3

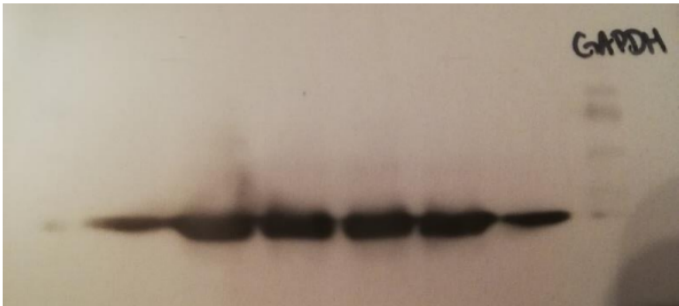

GAPDH

For Figure 4F:

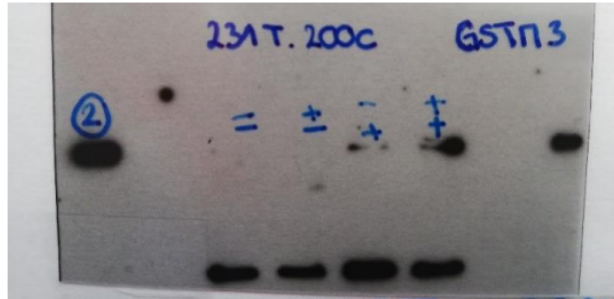

GSTM3

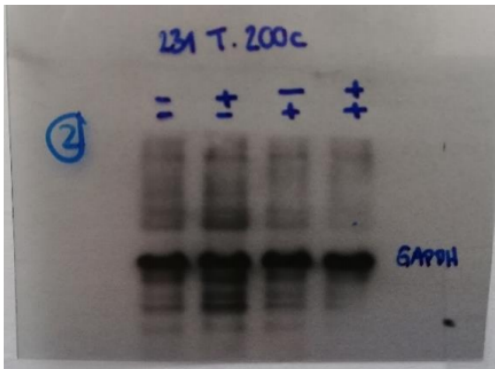

GAPDH

Figure S10: Uncropped blots of western blots presented in Figure 4B,D,F

Table S1

| MDA-MB 231 Tript 200c -DOX       |            |            |            | MDA-MB 231 Tript 200c +DOX       |            |            |            |
|----------------------------------|------------|------------|------------|----------------------------------|------------|------------|------------|
| gene                             | Ct value 1 | Ct value 2 | Ct value 3 | gene                             | Ct value 1 | Ct value 2 | Ct value 3 |
| mu family                        |            |            |            | mu family                        |            |            |            |
| GSTM1                            | 26.85      | 26.87      | 26.92      | GSTM1                            | 27.51      | 27.53      | 27.62      |
| GSTM2                            | 28.25      | 28.29      | 28.91      | GSTM2                            | 29.05      | 28.86      | 29.12      |
| GSTM3                            | 27.84      | 27.78      | 27.82      | GSTM3                            | 28.37      | 28.28      | 28.25      |
| GSTM4                            | 25.86      | 26         | 26.03      | GSTM4                            | 26.23      | 26.16      | 26.23      |
| GSTM5                            | 37.65      | 37.11      | 40         | GSTM5                            | 37.61      | 38.18      | 38.18      |
| GAPDH                            | 19.6       | 19.47      | 19.46      | GAPDH                            | 19.74      | 19.68      | 19.66      |
| alpha and kappa family           |            |            |            | alpha and kappa family           |            |            |            |
| GSTA1                            |            |            |            | GSTA1                            |            |            |            |
| GSTA2                            |            |            |            | GSTA2                            |            |            |            |
| GSTA3                            | 40         | 40         | 40         | GSTA3                            | 38.53      | 40         | 37.25      |
| GSTA4                            | 37.42      | 36.76      | 37.28      | GSTA4                            | 40         | 40         | 37.63      |
| GSTA5                            | 38.38      | 40         | 40         | GSTA5                            | 40         | 40         | 40         |
| GSTK1                            | 24.88      | 24.87      | 24.86      | GSTK1                            | 24.67      | 24.66      | 24.67      |
| GAPDH                            | 19.42      | 19.24      | 19.01      | GAPDH                            | 19.26      | 19.34      | 19.16      |
| MAPEG family part 1              |            |            |            | MAPEG family part 1              |            |            |            |
| MGST1                            |            |            |            | MGST1                            |            |            |            |
| MGST2                            |            |            |            | MGST2                            |            |            |            |
| MGST3                            |            |            |            | MGST3                            |            |            |            |
| GAPDH                            | 19.42      | 19.24      | 19.01      | GAPDH                            | 19.26      | 19.34      | 19.16      |
| MAPEG family part 2              |            |            |            | MAPEG family part 2              |            |            |            |
| LTC4S                            | 40         | 40         | 40         | LTC4S                            |            |            |            |
| FLAP                             | 31.89      | 31.98      | 31.9       | FLAP                             | 32.21      | 32.43      | 32.34      |
| GAPDH                            | 19.34      | 19.46      | 19.46      | GAPDH                            | 19.63      | 19.66      | 19.68      |
| omega, pi, theta and zeta family |            |            |            | omega, pi, theta and zeta family |            |            |            |
| GSTO1                            | 29.73      | 29.67      | 29.54      | GSTO1                            | 30         | 30.09      | 30.06      |
| GSTO2                            | 30.8       | 30.79      | 30.76      | GSTO2                            | 29.98      | 30.11      | 30.08      |
| GSTP1                            | 23.23      | 23.2       | 23.25      | GSTP1                            | 23.62      | 23.62      | 23.82      |
| GSTT1                            |            |            |            | GSTT1                            |            |            |            |
| GSTT2                            |            |            |            | GSTT2                            |            |            |            |
| GSTZ1                            | 24.13      | 24.06      | 23.87      | GSTZ1                            | 24.67      | 24.6       | 24.65      |
| GAPDH                            | 19.42      | 19.24      | 19.01      | GAPDH                            | 19.26      | 19.34      | 19.16      |

| MCF7 Tript 200c-sponge-DOX       |            |            |            | MCF7 Tript 200c-sponge+DOX       |            |            |            |
|----------------------------------|------------|------------|------------|----------------------------------|------------|------------|------------|
| gene                             | Ct value 1 | Ct value 2 | Ct value 3 | gene                             | Ct value 1 | Ct value 2 | Ct value 3 |
| mu family                        |            |            |            | mu family                        |            |            |            |
| GSTM1                            | 36.16      | 36.62      | 36.16      | GSTM1                            | 33.96      | 34         | 33.73      |
| GSTM2                            | 29.36      | 29.33      | 29.34      | GSTM2                            | 28.03      | 28         | 28         |
| GSTM3                            | 27.21      | 27.17      | 27.25      | GSTM3                            | 26.76      | 26.76      | 26.66      |
| GSTM4                            | 19.13      | 19.25      | 19.24      | GSTM4                            | 19.27      | 19.22      | 19.11      |
| GSTM5                            | 40         | 40         | 40         | GSTM5                            | 40         | 40         | 40         |
| GAPDH                            | 35.8       | 36.58      | 36.84      | GAPDH                            | 35.2       | 36.19      | 35.49      |
| alpha and kappa family           |            |            |            | alpha and kappa family           |            |            |            |
| GSTA1                            | 40         | 40         | 40         | GSTA1                            | 40         | 40         | 40         |
| GSTA2                            | 35.8       | 36.58      | 36.84      | GSTA2                            | 35.2       | 36.19      | 35.49      |
| GSTA3                            | 40         | 40         | 40         | GSTA3                            | 40         | 40         | 40         |
| GSTA4                            | 36.36      | 37         | 37.62      | GSTA4                            | 36.84      | 35.96      | 36.09      |
| GSTA5                            | 24.9       | 24.94      | 25         | GSTA5                            | 24.26      | 24.25      | 24.3       |
| GSTK1                            | 19.13      | 19.25      | 19.24      | GSTK1                            | 19.27      | 19.22      | 19.11      |
| GAPDH                            | 19.13      | 19.25      | 19.24      | GAPDH                            | 19.27      | 19.22      | 19.11      |
| MAPEG family part 1              |            |            |            | MAPEG family part 1              |            |            |            |
| MGST1                            | 27.05      | 26.87      | 27.03      | MGST1                            | 26.54      | 26.67      | 26.35      |
| MGST2                            | 37.27      | 37.09      | 37.17      | MGST2                            | 36.79      | 37.04      | 36.72      |
| MGST3                            | 25.32      | 25.4       | 25.56      | MGST3                            | 24.95      | 24.87      | 24.79      |
| LTC4S                            | 19.13      | 19.25      | 19.24      | LTC4S                            | 40         | 38.03      | 40         |
| GAPDH                            | 19.13      | 19.25      | 19.24      | GAPDH                            | 19.27      | 19.22      | 19.11      |
| MAPEG family part 2              |            |            |            | MAPEG family part 2              |            |            |            |
| FLAP                             | 18.99      | 19.11      | 19.13      | FLAP                             | 19.15      | 19.14      | 19.13      |
| GAPDH                            | 18.99      | 19.11      | 19.13      | GAPDH                            | 19.15      | 19.14      | 19.13      |
| omega, pi, theta and zeta family |            |            |            | omega, pi, theta and zeta family |            |            |            |
| GSTO1                            | 33.67      | 33.52      | 33.44      | GSTO1                            | 33.94      | 34.05      | 34.37      |
| GSTO2                            | 25.75      | 25.8       | 25.9       | GSTO2                            | 25.9       | 25.84      | 25.87      |
| GSTP1                            | 35.46      | 35.98      | 37.31      | GSTP1                            | 36.74      | 36.3       | 35.94      |
| GSTP1                            | 25.6       | 25.79      | 25.73      | GSTP1                            | 25.13      | 25.9       | 25.49      |
| GSTT2                            | 35.43      | 35.51      | 35.66      | GSTT2                            | 34.95      | 34.66      | 34.93      |
| GSTP1                            | 23.78      | 23.91      | 23.67      | GSTP1                            | 23.64      | 23.68      | 23.73      |
| GAPDH                            | 18.99      | 19.11      | 19.13      | GAPDH                            | 19.15      | 19.14      | 19.13      |
